# Supplementary material
Source: PubMed Central journal article supplement (PMC4369473)

# Supplementary Figure S2 - Ostrowski

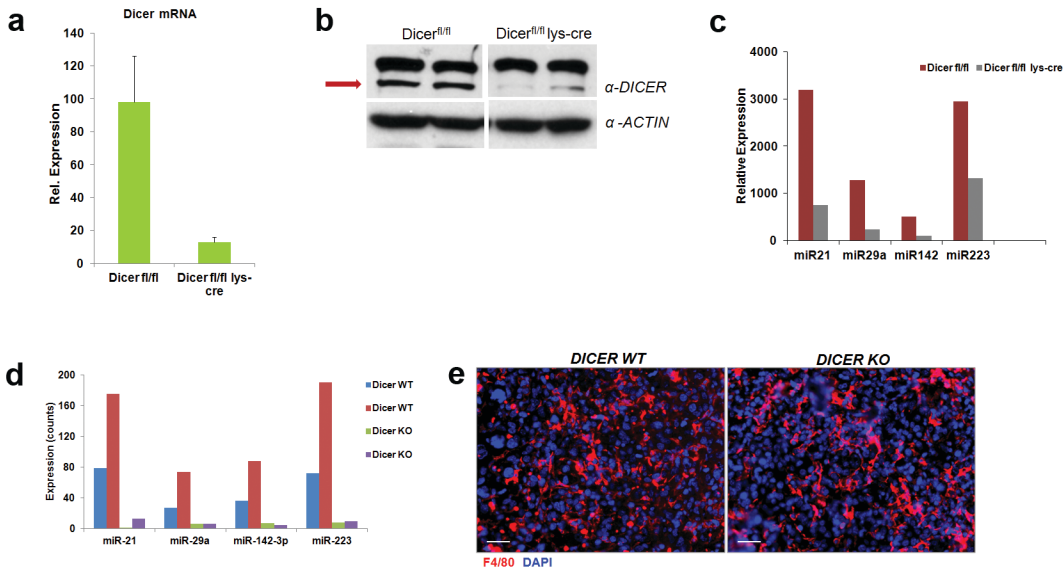

Supplement: NIHMS619137-supplement-3.pdf [file NIHMS619137-supplement-3.pdf]

# Supplementary Figure S4 - Ostrowski

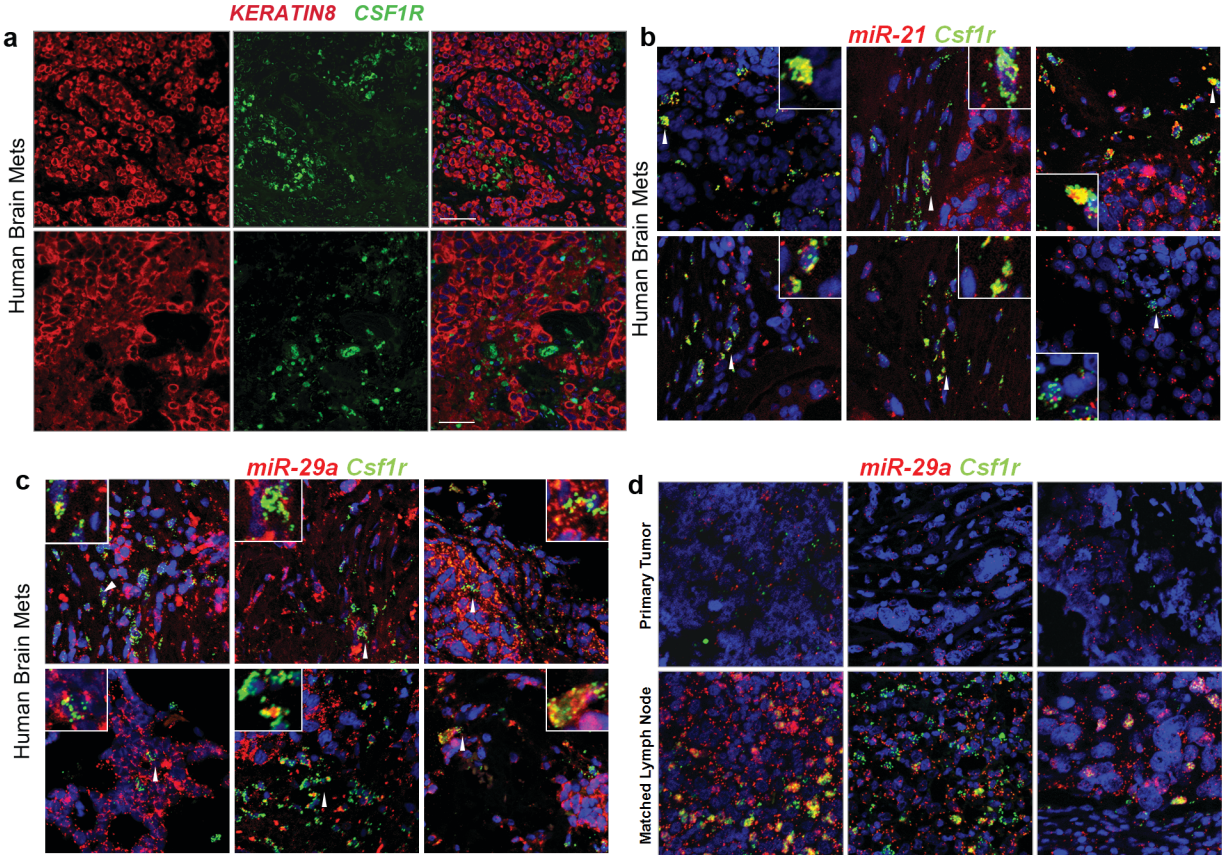

Supplement: NIHMS619137-supplement-5.pdf [file NIHMS619137-supplement-5.pdf]
